# Supplementary material
Source: PubMed Central journal article supplement (PMC6591589)
Supplement: AAC.00426-19-s0001.pdf [file AAC.00426-19-s0001.pdf]

Table S1. Experimental Scheme. The number of footpads (i.e., 2 per mouse) planned to be assessed for CFU analysis at each time point are shown.

|                                                                               | D-46     | D0       | W1        | W2        | W4        | W2+12     | W4+21     | W6+20     | Total      |
|-------------------------------------------------------------------------------|----------|----------|-----------|-----------|-----------|-----------|-----------|-----------|------------|
| Untreated                                                                     | 6        | 6        | 6         | 6         | 6         |           |           |           | 15         |
| RIF <sub>10</sub> +STR <sub>150</sub>                                         |          |          | 6         | 6         | 6         | 20        | 20        | 20        | 29         |
| RPT <sub>20</sub> +CFZ <sub>12.5</sub>                                        |          |          | 6         | 6         | 6         | 20        | 20        |           | 29         |
| <b>Tests</b>                                                                  |          |          |           |           |           |           |           |           |            |
| RPT <sub>20</sub> +CFZ <sub>12.5</sub> +BDQ <sub>25</sub>                     |          |          | 6         | 6         | 6         | 20        | 20        |           | 29         |
| RPT <sub>20</sub> +CFZ <sub>12.5</sub> +Q203 <sub>10</sub>                    |          |          | 6         | 6         | 6         | 20        | 20        |           | 29         |
| RPT <sub>20</sub> +BDQ <sub>25</sub> +Q203 <sub>10</sub>                      |          |          | 6         | 6         | 6         | 20        | 20        |           | 29         |
| RPT <sub>20</sub> +CFZ <sub>12.5</sub> +BDQ <sub>25</sub> +Q203 <sub>10</sub> |          |          | 6         | 6         | 6         | 20        | 20        |           | 29         |
| CFZ <sub>12.5</sub> +BDQ <sub>25</sub> +Q203 <sub>10</sub>                    |          |          | 6         | 6         | 6         | 20        | 20        |           | 29         |
| <b>Total</b>                                                                  | <b>6</b> | <b>6</b> | <b>24</b> | <b>24</b> | <b>24</b> | <b>70</b> | <b>70</b> | <b>20</b> | <b>228</b> |

Table S2. Mouse footpad swelling grades (mean±s.d.) at Day 0 and during treatment

| Week | Treatment Groups* |            |           |           |           |           |           |           |
|------|-------------------|------------|-----------|-----------|-----------|-----------|-----------|-----------|
|      | UT                | RS         | PC        | PCB       | PCQ       | PBQ       | PCBQ      | CBQ       |
| 0    | 2.56±0.36         | 2.83±0.38  | 2.86±0.34 | 2.81±0.25 | 3.00±0.23 | 3.03±0.17 | 3.01±0.24 | 2.98±0.25 |
| 1    | 3.50±0.289        | 2.58±0.34  | 2.63±0.14 | 2.50±0.00 | 1.75±0.50 | 2.33±0.26 | 2.67±0.26 | 1.71±0.43 |
| 2    | 3.58±0.38         | 1.78±0.47  | 2.34±0.75 | 1.54±0.51 | 0.92±0.54 | 1.12±0.31 | 1.27±0.51 | 1.18±0.46 |
| 3    |                   | 1.45±0.60  | 1.61±0.90 | 1.15±0.41 | 0.55±0.42 | 0.83±0.28 | 1.07±0.50 | 1.01±0.41 |
| 4    |                   | 0.85±0.49  | 1.03±0.60 | 0.63±0.33 | 0.28±0.21 | 0.61±0.26 | 0.55±0.20 | 0.45±0.21 |
| 6    |                   | 0.358±0.27 | 0.30±0.19 | 0.37±0.18 | 0.12±0.16 | 0.44±0.19 | 0.33±0.22 | 0.27±0.21 |
| 8    |                   | 0.363±0.20 | 0.32±0.23 | 0.28±0.17 | 0.11±0.15 | 0.34±0.21 | 0.33±0.20 | 0.32±0.23 |

\*UT= Untreated; RS= RIF<sub>10</sub>+STR<sub>150</sub>; PC= RPT<sub>20</sub>+CFZ<sub>12.5</sub>;  
PCB= RPT<sub>20</sub>+CFZ<sub>12.5</sub>+BDQ<sub>25</sub>; PCQ= RPT<sub>20</sub>+CFZ<sub>12.5</sub>+Q203<sub>10</sub>; PBQ= RPT<sub>20</sub>+BDQ<sub>25</sub>+Q203<sub>10</sub>;  
PCBQ= RPT<sub>20</sub>+CFZ<sub>12.5</sub>+BDQ<sub>25</sub>+Q203<sub>10</sub>; CBQ= CFZ<sub>12.5</sub>+BDQ<sub>25</sub>+Q203<sub>10</sub>

Fig. S1. Mean ( $\pm$  sd) footpad swelling grades by treatment group and treatment duration

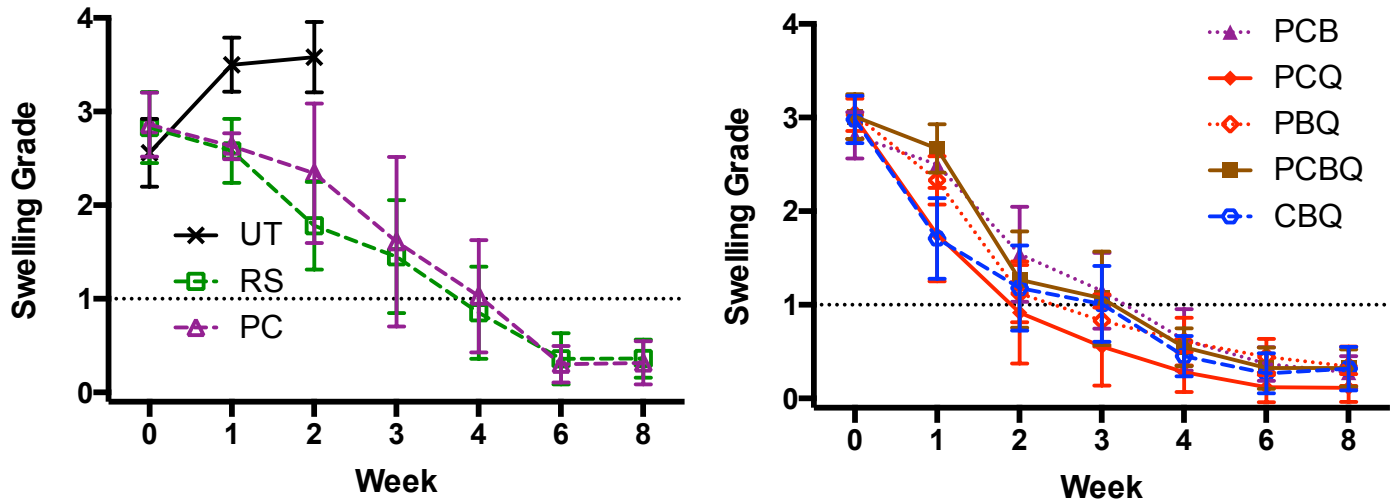

Tables S3. Results of statistical analyses

Tables S3a-h: Test the efficacy of each Test Regimen compared to the RS control in terms of footpad swelling (S3a-f) and CFU reduction (S3g-h) at the indicated time points.

S3a. Week 1 Swelling

| Bonferroni's multiple comparisons test | Mean Diff. | Significant? | Adjusted P Value |
|----------------------------------------|------------|--------------|------------------|
| RS vs. PCB                             | 0.08333    | No           | > 0.9999         |
| RS vs. PCQ                             | 0.83333    | Yes          | 0.0009           |
| RS vs. PBQ                             | 0.25000    | No           | > 0.9999         |
| RS vs. PCBQ                            | -0.08333   | No           | > 0.9999         |
| RS vs. CBQ                             | 0.87500    | Yes          | 0.0005           |

S3b. Week 2 Swelling

| Bonferroni's multiple comparisons test | Mean Diff. | Significant? | Adjusted P Value |
|----------------------------------------|------------|--------------|------------------|
| RS vs. PCB                             | 0.2393     | Yes          | 0.0283           |
| RS vs. PCQ                             | 0.8595     | Yes          | < 0.0001         |
| RS vs. PBQ                             | 0.6624     | Yes          | < 0.0001         |
| RS vs. PCBQ                            | 0.5085     | Yes          | < 0.0001         |
| RS vs. CBQ                             | 0.5999     | Yes          | < 0.0001         |

S3c. Week 3 Swelling

| Bonferroni's multiple comparisons test | Mean Diff. | Significant? | Adjusted P Value |
|----------------------------------------|------------|--------------|------------------|
| RS vs. PCB                             | 0.2986     | Yes          | 0.0040           |
| RS vs. PCQ                             | 0.8964     | Yes          | < 0.0001         |
| RS vs. PBQ                             | 0.6192     | Yes          | < 0.0001         |
| RS vs. PCBQ                            | 0.3801     | Yes          | 0.0001           |
| RS vs. CBQ                             | 0.4399     | Yes          | < 0.0001         |

S3d. Week 4 Swelling

| Bonferroni's multiple comparisons test | Mean Diff. | Significant? | Adjusted P Value |
|----------------------------------------|------------|--------------|------------------|
|----------------------------------------|------------|--------------|------------------|

|             |        |     |          |
|-------------|--------|-----|----------|
| RS vs. PCB  | 0.2273 | Yes | 0.0012   |
| RS vs. PCQ  | 0.5697 | Yes | < 0.0001 |
| RS vs. PBQ  | 0.2447 | Yes | 0.0004   |
| RS vs. PCBQ | 0.3034 | Yes | < 0.0001 |
| RS vs. CBQ  | 0.4012 | Yes | < 0.0001 |

### S3e. Week 6 Swelling

| Bonferroni's multiple comparisons test | Mean Diff. | Significant? | Adjusted P Value |
|----------------------------------------|------------|--------------|------------------|
| RS vs. PCB                             | -0.01042   | No           | > 0.9999         |
| RS vs. PCQ                             | 0.2396     | Yes          | < 0.0001         |
| RS vs. PBQ                             | -0.08542   | No           | 0.2667           |
| RS vs. PCBQ                            | 0.03333    | No           | > 0.9999         |
| RS vs. CBQ                             | 0.08958    | No           | 0.2140           |

### S3f. Week 8 Swelling

| Bonferroni's multiple comparisons test | Mean Diff. | Significant? | Adjusted P Value |
|----------------------------------------|------------|--------------|------------------|
| RS vs. PCB                             | 0.08375    | No           | 0.1894           |
| RS vs. PCQ                             | 0.2500     | Yes          | < 0.0001         |
| RS vs. PBQ                             | 0.01875    | No           | > 0.9999         |
| RS vs. PCBQ                            | 0.0375     | No           | > 0.9999         |
| RS vs. CBQ                             | 0.04375    | No           | > 0.9999         |

### S3g. Week 1 CFU

| Bonferroni's multiple comparisons test | Mean Diff. | Significant? | Adjusted P Value |
|----------------------------------------|------------|--------------|------------------|
| RS vs. PCB                             | 0.3967     | No           | > 0.9999         |
| RS vs. PCQ                             | 1.063      | No           | 0.0513           |
| RS vs. PBQ                             | 1.473      | Yes          | 0.0033           |
| RS vs. PCBQ                            | 1.065      | No           | 0.0507           |
| RS vs. CBQ                             | 2.027      | Yes          | < 0.0001         |

### S3h. Week 2 CFU

| Bonferroni's multiple comparisons test | Mean Diff. | Significant? | Adjusted P Value |
|----------------------------------------|------------|--------------|------------------|
| RS vs. PCB                             | 2.658      | Yes          | 0.0006           |
| RS vs. PCQ                             | 4.382      | Yes          | < 0.0001         |
| RS vs. PBQ                             | 3.297      | Yes          | < 0.0001         |
| RS vs. PCBQ                            | 4.482      | Yes          | < 0.0001         |
| RS vs. CBQ                             | 3.112      | Yes          | < 0.0001         |

Tables S3i-p: Test the efficacy of each Test Regimen compared to the PC control in terms of footpad swelling (S3i-n) and CFU reduction (S3o-p) at the indicated time points.

**S3i. Week 1 Swelling**

| Bonferroni's multiple comparisons test | Mean Diff. | Significant? | Adjusted P Value |
|----------------------------------------|------------|--------------|------------------|
| PC vs. PCB                             | 0.1250     | No           | > 0.9999         |
| PC vs. PCQ                             | 0.8750     | Yes          | 0.0002           |
| PC vs. PBQ                             | 0.2917     | No           | 0.5845           |
| PC vs. PCBQ                            | -0.04167   | No           | > 0.9999         |
| PC vs. CBQ                             | 0.9167     | Yes          | < 0.0001         |

**S3j. Week 2 Swelling**

| Bonferroni's multiple comparisons test | Mean Diff. | Significant? | Adjusted P Value |
|----------------------------------------|------------|--------------|------------------|
| PC vs. PCB                             | 0.8015     | Yes          | < 0.0001         |
| PC vs. PCQ                             | 1.422      | Yes          | < 0.0001         |
| PC vs. PBQ                             | 1.225      | Yes          | < 0.0001         |
| PC vs. PCBQ                            | 1.071      | Yes          | < 0.0001         |
| PC vs. CBQ                             | 1.162      | Yes          | < 0.0001         |

**S3k. Week 3 Swelling**

| Bonferroni's multiple comparisons test | Mean Diff. | Significant? | Adjusted P Value |
|----------------------------------------|------------|--------------|------------------|
| PC vs. PCB                             | 0.4558     | Yes          | 0.0002           |
| PC vs. PCQ                             | 1.054      | Yes          | < 0.0001         |
| PC vs. PBQ                             | 0.7764     | Yes          | < 0.0001         |
| PC vs. PCBQ                            | 0.5373     | Yes          | < 0.0001         |
| PC vs. CBQ                             | 0.5971     | Yes          | < 0.0001         |

**S3l. Week 4 Swelling**

| Bonferroni's multiple comparisons test | Mean Diff. | Significant? | Adjusted P Value |
|----------------------------------------|------------|--------------|------------------|
| PC vs. PCB                             | 0.4034     | Yes          | < 0.0001         |
| PC vs. PCQ                             | 0.7458     | Yes          | < 0.0001         |
| PC vs. PBQ                             | 0.4208     | Yes          | < 0.0001         |
| PC vs. PCBQ                            | 0.4795     | Yes          | < 0.0001         |
| PC vs. CBQ                             | 0.5773     | Yes          | < 0.0001         |

**S3m. Week 6 Swelling**

| Bonferroni's multiple comparisons test | Mean Diff. | Significant? | Adjusted P Value |
|----------------------------------------|------------|--------------|------------------|
| PC vs. PCB                             | -0.06612   | No           | 0.6740           |
| PC vs. PCQ                             | 0.1839     | Yes          | 0.0002           |
| PC vs. PBQ                             | -0.1411    | Yes          | 0.0078           |
| PC vs. PCBQ                            | -0.02237   | No           | > 0.9999         |
| PC vs. CBQ                             | 0.03388    | No           | > 0.9999         |

### S3n. Week 8 Swelling

| Bonferroni's multiple comparisons test | Mean Diff. | Significant? | Adjusted P Value |
|----------------------------------------|------------|--------------|------------------|
| PC vs. PCB                             | 0.03704    | No           | > 0.9999         |
| PC vs. PCQ                             | 0.2033     | Yes          | < 0.0001         |
| PC vs. PBQ                             | -0.02796   | No           | > 0.9999         |
| PC vs. PCBQ                            | -0.009211  | No           | > 0.9999         |
| PC vs. CBQ                             | -0.002961  | No           | > 0.9999         |

### S3o. Week 1 CFU

| Bonferroni's multiple comparisons test | Mean Diff. | Significant? | Adjusted P Value |
|----------------------------------------|------------|--------------|------------------|
| PC vs. PCB                             | 0.4750     | No           | > 0.9999         |
| PC vs. PCQ                             | 1.142      | Yes          | 0.0296           |
| PC vs. PBQ                             | 1.552      | Yes          | 0.0018           |
| PC vs. PCBQ                            | 1.143      | Yes          | 0.0293           |
| PC vs. CBQ                             | 2.105      | Yes          | < 0.0001         |

### S3p. Week 2 CFU

| Bonferroni's multiple comparisons test | Mean Diff. | Significant? | Adjusted P Value |
|----------------------------------------|------------|--------------|------------------|
| PC vs. PCB                             | 1.579      | No           | 0.1502           |
| PC vs. PCQ                             | 3.303      | Yes          | 0.0003           |
| PC vs. PBQ                             | 2.218      | Yes          | 0.0166           |
| PC vs. PCBQ                            | 3.403      | Yes          | 0.0002           |
| PC vs. CBQ                             | 2.033      | Yes          | 0.0324           |

Tables S3q-x: Test if each drug in the 4-drug regimen (PCBQ) can be removed singly (i.e., yielding a 3-drug regimen) without loss of efficacy in terms of footpad swelling (S3q-v) and CFU reduction (S3w-x) at the indicated time points.

### S3q. Week 1 Swelling

| Bonferroni's multiple comparisons test | Mean Diff. | Significant? | Adjusted P Value |
|----------------------------------------|------------|--------------|------------------|
| PCBQ vs. PCB                           | 0.1667     | No           | > 0.9999         |
| PCBQ vs. PCQ                           | 0.9167     | Yes          | 0.0003           |
| PCBQ vs. PBQ                           | 0.3333     | No           | 0.3972           |
| PCBQ vs. CBQ                           | 0.9583     | Yes          | 0.0002           |

### S3r. Week 2 Swelling

| Bonferroni's multiple comparisons test | Mean Diff. | Significant? | Adjusted P Value |
|----------------------------------------|------------|--------------|------------------|
| PCBQ vs. PCB                           | -0.2692    | Yes          | 0.0162           |
| PCBQ vs. PCQ                           | 0.3510     | Yes          | 0.0008           |
| PCBQ vs. PBQ                           | 0.1538     | No           | 0.3943           |
| PCBQ vs. CBQ                           | 0.09135    | No           | > 0.9999         |

### S3s. Week 3 Swelling

| Bonferroni's multiple comparisons test | Mean Diff. | Significant? | Adjusted P Value |
|----------------------------------------|------------|--------------|------------------|
| PCBQ vs. PCB                           | -0.08152   | No           | > 0.9999         |
| PCBQ vs. PCQ                           | 0.5163     | Yes          | < 0.0001         |
| PCBQ vs. PBQ                           | 0.2391     | Yes          | 0.0213           |
| PCBQ vs. CBQ                           | 0.05978    | No           | > 0.9999         |

### S3t. Week 4 Swelling

| Bonferroni's multiple comparisons test | Mean Diff. | Significant? | Adjusted P Value |
|----------------------------------------|------------|--------------|------------------|
| PCBQ vs. PCB                           | -0.07609   | No           | 0.5664           |
| PCBQ vs. PCQ                           | 0.2663     | Yes          | < 0.0001         |
| PCBQ vs. PBQ                           | -0.05870   | No           | > 0.9999         |
| PCBQ vs. CBQ                           | 0.09783    | No           | 0.2367           |

### S3u. Week 6 Swelling

| Bonferroni's multiple comparisons test | Mean Diff. | Significant? | Adjusted P Value |
|----------------------------------------|------------|--------------|------------------|
| PCBQ vs. PCB                           | -0.04375   | No           | > 0.9999         |
| PCBQ vs. PCQ                           | 0.2063     | Yes          | < 0.0001         |
| PCBQ vs. PBQ                           | -0.1188    | Yes          | 0.0277           |
| PCBQ vs. CBQ                           | 0.05625    | No           | 0.7902           |

### S3v. Week 8 Swelling

| Bonferroni's multiple comparisons test | Mean Diff. | Significant? | Adjusted P Value |
|----------------------------------------|------------|--------------|------------------|
| PCBQ vs. PCB                           | 0.04625    | No           | > 0.9999         |
| PCBQ vs. PCQ                           | 0.2125     | Yes          | < 0.0001         |
| PCBQ vs. PBQ                           | -0.01875   | No           | > 0.9999         |
| PCBQ vs. CBQ                           | 0.00625    | No           | > 0.9999         |

### S3w. Week 1 CFU

| Bonferroni's multiple comparisons test | Mean Diff. | Significant? | Adjusted P Value |
|----------------------------------------|------------|--------------|------------------|
| PCBQ vs. PCB                           | -0.6683    | No           | 0.4859           |
| PCBQ vs. PCQ                           | -0.001667  | No           | > 0.9999         |
| PCBQ vs. PBQ                           | 0.4083     | No           | > 0.9999         |
| PCBQ vs. CBQ                           | 0.9617     | No           | 0.1186           |

### S3x. Week 2 CFU

| Bonferroni's multiple comparisons test | Mean Diff. | Significant? | Adjusted P Value |
|----------------------------------------|------------|--------------|------------------|
| PCBQ vs. PCB                           | -1.823     | Yes          | 0.0393           |
| PCBQ vs. PCQ                           | -0.1000    | No           | > 0.9999         |
| PCBQ vs. PBQ                           | -1.185     | No           | 0.3253           |
| PCBQ vs. CBQ                           | -1.370     | No           | 0.1839           |
